# Supplementary material
Source: PubMed Central journal article supplement (PMC2800347)
Supplement: btp384_2.pdf [file btp384_2.pdf]

(a) Un-Normalized

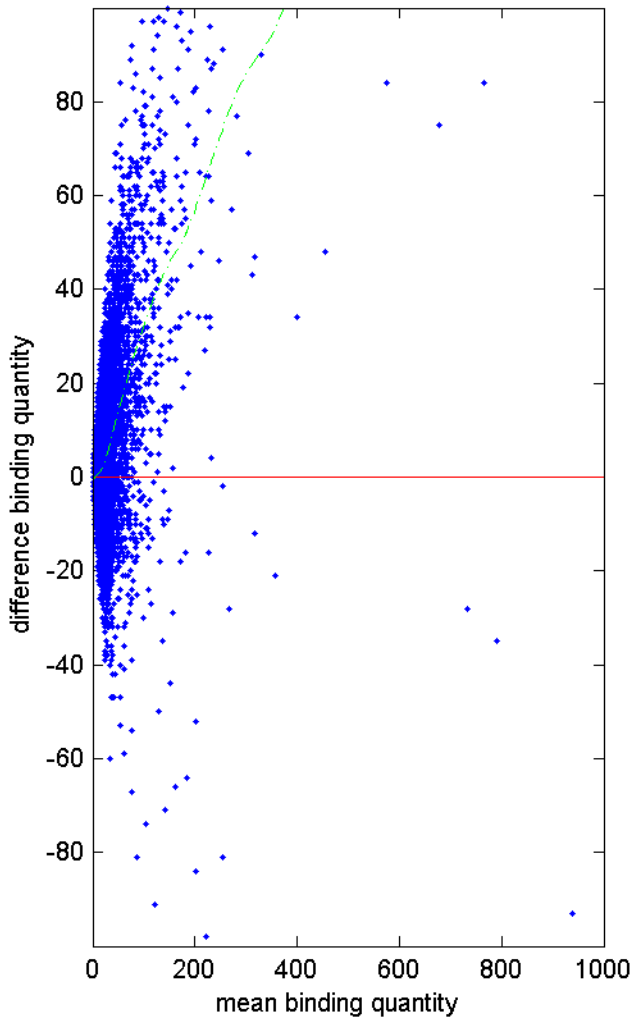

(a) Sequence Depth Normalized

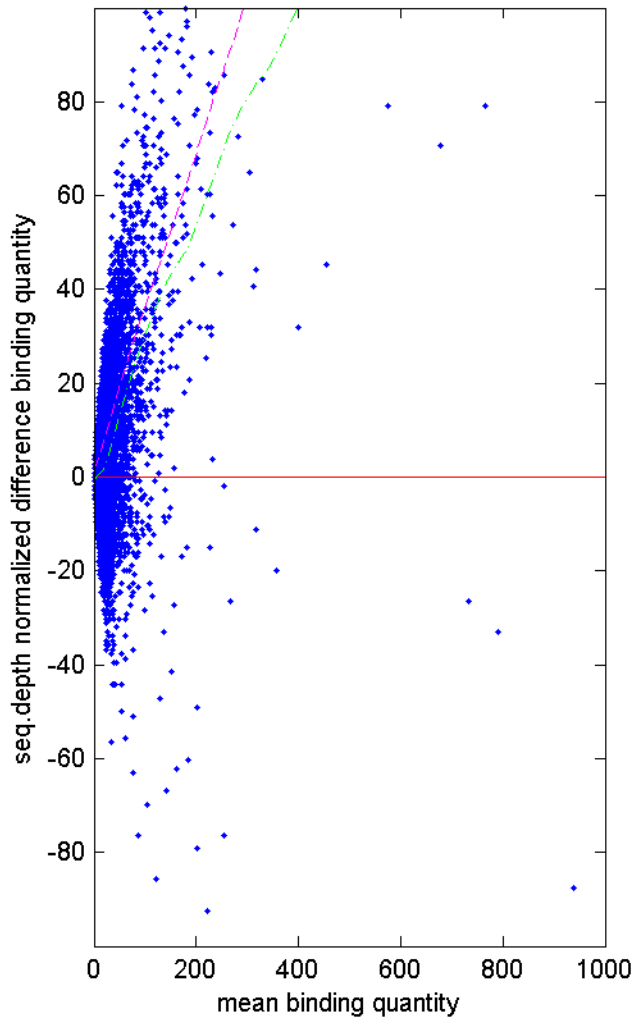

**Supplementary Figure 2.** MCF7 vs. MCF7+E2 on chromosome 1 data normalized based on their sequence depth. The green (dot-dashed) line shows the estimated mean calculated using LOESS. The magenta (dash) line represents the estimated variance (using LOESS). This figure indicates bias toward the positive direction even after normalization.
