# Supplementary material
Source: PubMed Central journal article supplement (PMC2800347)
Supplement: btp384_5.pdf [file btp384_5.pdf]

| GO term                                                                                 | no. genes | p-value |
|-----------------------------------------------------------------------------------------|-----------|---------|
| Protein modification (BP)                                                               | 43        | 6.87e-6 |
| Positive regulation of transcription (BP)                                               | 10        | 4.19e-5 |
| Guanyl-nucleotide exchange factor activity (MF)                                         | 10        | 5.86e-5 |
| Positive regulation of nucleobase, nucleoside, nucleotide, nucleic acid metabolism (BP) | 10        | 6.19e-5 |
| GTPase regulator activity (MF)                                                          | 15        | 6.23e-5 |
| ATP binding (MF)                                                                        | 37        | 1.53e-4 |
| Biopolimer metabolism (BP)                                                              | 63        | 1.56e-4 |
| RNA capping (BP)                                                                        | 2         | 2.61e-4 |
| mRNA capping (BP)                                                                       | 2         | 2.61e-4 |
| Phosphorus metabolism (BP)                                                              | 27        | 2.81e-4 |
| Phosphate metabolism (BP)                                                               | 27        | 2.81e-4 |
| Positive regulation of cellular metabolism (BP)                                         | 11        | 2.94e-4 |
| Regulation of cellular process (BP)                                                     | 78        | 3.51e-4 |
| Actin cytoskeleton (CC)                                                                 | 11        | 4.59e-4 |
| Negative regulation of cellular physiological process (BP)                              | 23        | 4.89e-4 |

Supplementary Table 1: List of top 15 enriched gene ontology categories for 311 genes uniquely associated with decreased bindings in OHT. MF(Molecular Function), BP(Biological Process), CC(Cellular Component)
